# Supplementary material
Source: publisher site journal article supplement (https://www.dovepress.com/article/352538)

**Supplementary materials**

**Figure S1** The whole process of tumor resection surgery including an established orthotopic model of breast cancer (**A**), resection of breast tumor (90%~95%) (**B**) and suture of wound after surgery (**C**) in BALB/c nude mice. Places pointed by the black arrow represented tumor site, residual tumors after surgery and sutured wound in the surgical site.


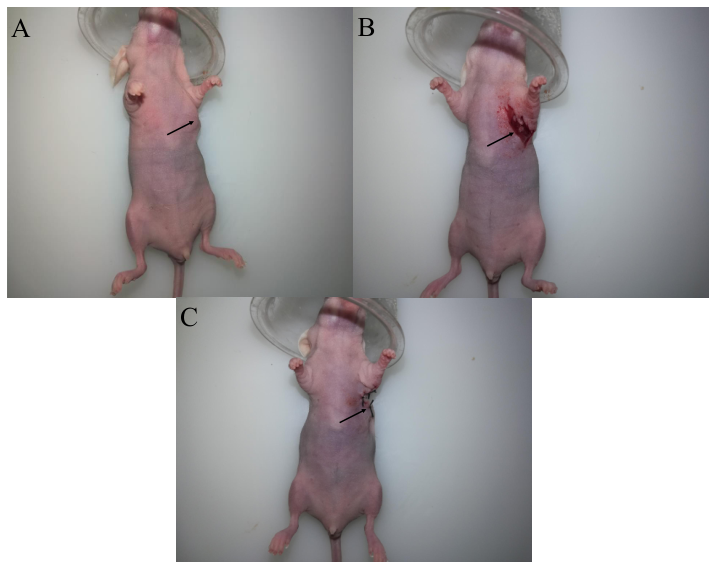


**Figure S2** Morphology of jejunum was from HTPM orally administered (**A**) and HTPM administered orally combined with surgery on orthotopic TNBC in nude mice (**B**). Places pointed by the black arrow in the jejunum picture of HF group and TRS+HF group represent the phenomenon of jejunum hemorrhage.


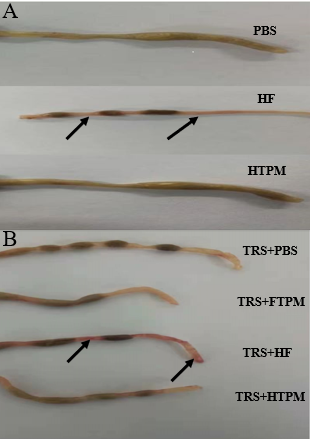

Supplement: Supplementary file 1 [file get_supplementary_file.php]
